# Supplementary material for: A 3D-Printed Modular Microreservoir for Drug Delivery
Source: MDPI journal article supplement (doi:10.3390/mi11070648), 2020-06-30
Supplement: s1 [file s1]

# Supplementary Material

## A 3D-Printed Modular Microreservoir for Drug Delivery

Farzad Forouzandeh, Nuzhet N. Ahamed, Meng-Chun Hsu, Joseph P. Walton, Robert D. Frisina and David A. Borkholder

Detailed design and dimension of microreservoir components

**1  $\mu\text{L}$**

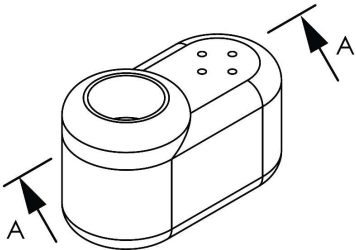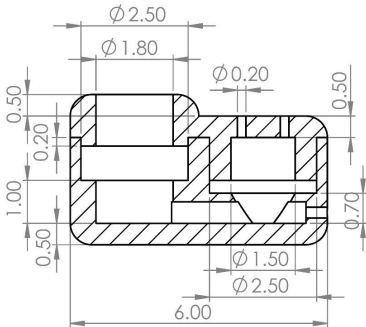

**10  $\mu\text{L}$**

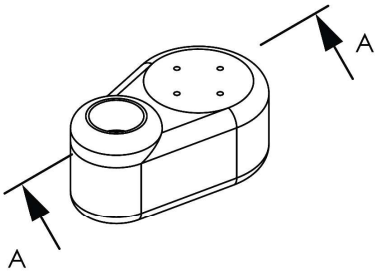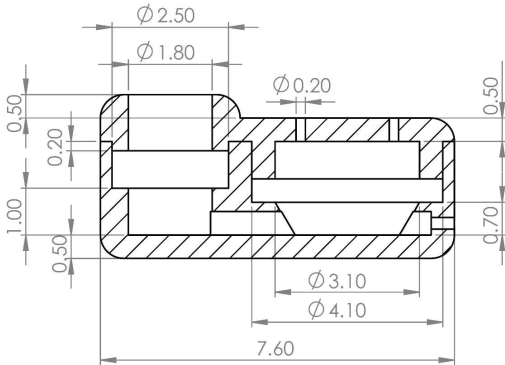

**100  $\mu\text{L}$**

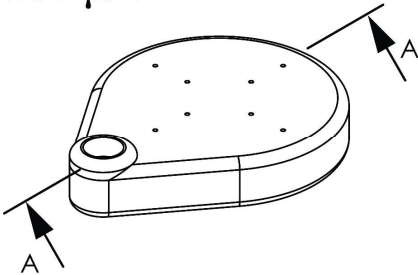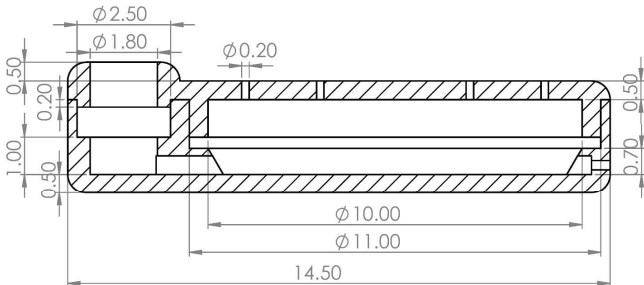

SECTION A-A (For all three models)

**Figure S1.** Iso view of three different stand-alone microreservoirs along with cut view at section A-A. Dimensions all in mm. Dimensions not to be scaled.
